# Supplementary material for: Multifunctional near-infrared emitting Cr3+-doped Mg4Ga8Ge2O20particles with long persistent and photostimulated persistent luminescence, and photochromic properties
Source: Royal Society of Chemistry journal article supplement (doi:10.1039/c6tc01640e), 2016-01-01
Supplement: c6tc01640e1.pdf [file c6tc01640e1.pdf]

## Supporting Information

### **Multifunctional Near-Infrared Emitting Cr<sup>3+</sup>-doped Mg<sub>4</sub>Ga<sub>8</sub>Ge<sub>2</sub>O<sub>20</sub> Particles with Long Persistent, Photostimulated Luminescence and Photochromism properties**

Yahong Jin,<sup>a</sup> Yihua Hu,<sup>\*a</sup> Lifang Yuan,<sup>b</sup> Li Chen,<sup>a</sup> Haoyi Wu,<sup>a</sup> Guifang Ju,<sup>a</sup> He Duan,<sup>a</sup>  
and Zhongfei Mu<sup>a</sup>

<sup>a</sup>School of Physics and Optoelectronic Engineering, Guangdong University of  
Technology, WaiHuan Xi Road, No.100, Guangzhou 510006, PR China

<sup>b</sup>Shenzhen Institutes of Advanced Technology, Chinese Academy of Sciences, 1068  
Xueyuan Avenue, Shenzhen 518055, PR China

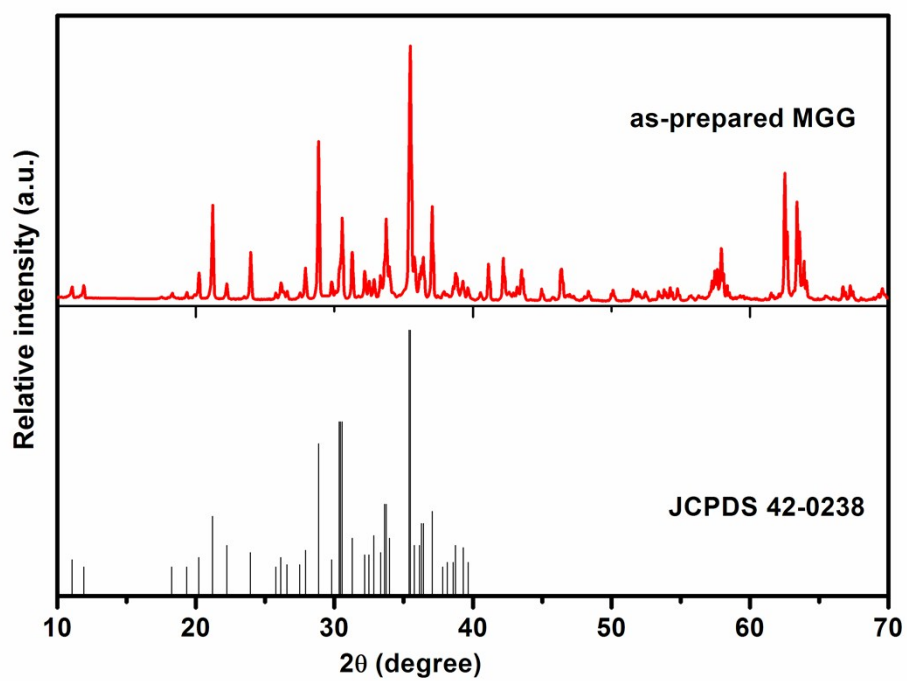

(a)

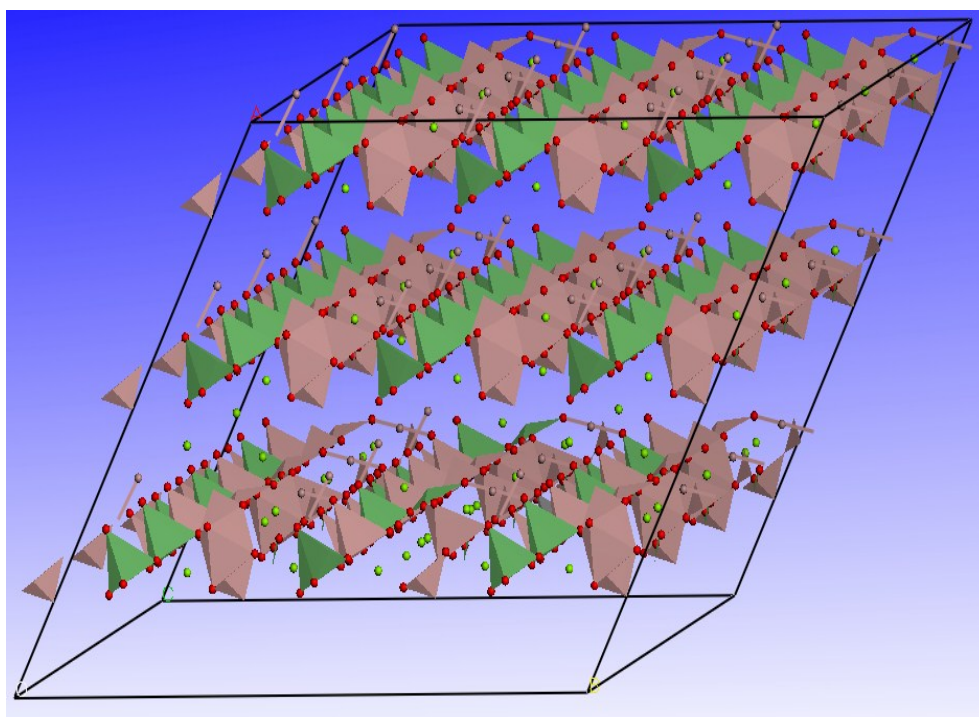

(b)

**Fig. S1** (a) XRD patterns of as-prepared MGG and JCPDS 42-0238. (b) Crystal structure of MGG.

**Table S1.** Refined structure parameters of  $\text{Mg}_4\text{Ga}_{7.999}\text{Ge}_2\text{O}_{20}:\text{0.001Cr}^{3+}$  derived from the Rietveld refinement of X-ray diffraction data

| Atoms | Wyckoff position | x       | y      | z       | Frac.  | Uiso        |
|-------|------------------|---------|--------|---------|--------|-------------|
| Mg1   | 2i               | 0.8326  | 0.8491 | 0.4573  | 0.1475 | 0.000131    |
| Mg2   | 2i               | 0.1376  | 0.1663 | 0.0509  | 0.1701 | 0.001143    |
| Mg3   | 2i               | 0.9476  | 0.9418 | 0.6633  | 0.4836 | 0.000643    |
| Mg4   | 2i               | 0.9367  | 0.9377 | 0.1678  | 0.8764 | 0.000176    |
| Mg5   | 2i               | 0.6291  | 0.6452 | 0.5741  | 1.0000 | 0.001018    |
| Mg6   | 2i               | 0.6393  | 0.6275 | 0.0559  | 1.0000 | 0.001627    |
| Mg7   | 2i               | 0.7538  | 0.7358 | 0.2515  | 0.1169 | 0.001405    |
| Mg8   | 2d               | 0.5000  | 0.0000 | 0.0000  | 0.2233 | 0.002936    |
| Mg9   | 2g               | 0.0000  | 0.5000 | 0.5000  | 0.2324 | 0.003551    |
| Ga1   | 2i               | 0.8326  | 0.8491 | 0.4573  | 0.8523 | 0.000131    |
| Ga2   | 2i               | 0.1376  | 0.1663 | 0.0509  | 0.8289 | 0.001142623 |
| Ga3   | 2i               | 0.9476  | 0.9418 | 0.6633  | 0.5159 | 0.000643499 |
| Ga4   | 2i               | 0.9367  | 0.9377 | 0.1678  | 0.1227 | 0.000176125 |
| Ga5   | 2i               | 0.7538  | 0.7358 | 0.2515  | 0.8827 | 0.001405373 |
| Ga6   | 2d               | 0.5000  | 0.0000 | 0.0000  | 0.7764 | 0.002935995 |
| Ga7   | 2g               | 0.0000  | 0.5000 | 0.5000  | 0.7673 | 0.003551494 |
| Ga8   | 2i               | 0.7512  | 0.3619 | 0.4231  | 0.1077 | 0.003580369 |
| Ga9   | 2i               | 0.7606  | 0.3531 | 0.9145  | 0.2793 | 0.002609996 |
| Ga10  | 2i               | 0.6496  | 0.2514 | 0.2200  | 0.0366 | 0.002585246 |
| Ga11  | 2i               | 0.6381  | 0.2484 | 0.7172  | 0.9389 | 7.04999E-05 |
| Ga12  | 2i               | 0.9432  | 0.5687 | 0.8033  | 0.9318 | 0.002194371 |
| Ga13  | 2i               | 0.5698  | 0.9411 | 0.6876  | 0.1499 | 0.001114623 |
| Ge1   | 2i               | 0.7512  | 0.3619 | 0.4231  | 0.8923 | 0.003580369 |
| Ge2   | 2i               | 0.7606  | 0.3531 | 0.9145  | 0.6707 | 0.002609996 |
| Ge3   | 2i               | 0.6496  | 0.2514 | 0.2200  | 0.9534 | 0.002585246 |
| Ge4   | 2i               | 0.6381  | 0.2484 | 0.7172  | 0.0411 | 7.04999E-05 |
| Ge5   | 2i               | 0.9432  | 0.5687 | 0.8033  | 0.0582 | 0.002194371 |
| Ge6   | 2i               | 0.5698  | 0.9411 | 0.6876  | 0.8501 | 0.001114623 |
| O1    | 2i               | 0.6169  | 0.8632 | 0.3914  | 1.0000 | 0.000887499 |
| O2    | 2i               | 0.6278  | 0.8721 | 0.8841  | 1.0000 | 0.000837499 |
| O3    | 2i               | 0.8285  | 0.0610 | 0.3025  | 1.0000 | 0.000774999 |
| O4    | 2i               | 0.8259  | 0.0551 | 0.8117  | 1.0000 | 0.000862499 |
| O5    | 2i               | 0.7214  | 0.9340 | 0.6005  | 1.0000 | 0.001262498 |
| O6    | 2i               | 0.7310  | 0.9392 | 0.0689  | 1.0000 | 0.001012498 |
| O7    | 2i               | -0.0628 | 0.1563 | 0.4905  | 1.0000 | 0.000962498 |
| O8    | 2i               | -0.0638 | 0.1675 | -0.0380 | 1.0000 | 0.000799999 |
| O9    | 2i               | 0.8795  | 0.6192 | 0.6232  | 1.0000 | 0.000724999 |
| O10   | 2i               | 0.8656  | 0.6211 | 0.1250  | 1.0000 | 0.000974998 |
| O11   | 2i               | 0.6756  | 0.3938 | 0.7428  | 1.0000 | 0.000924998 |

|     |    |         |        |         |        |             |
|-----|----|---------|--------|---------|--------|-------------|
| O12 | 2i | 0.6719  | 0.4072 | 0.2414  | 1.0000 | 0.000787499 |
| O13 | 2i | -0.0325 | 0.7471 | 0.8212  | 1.0000 | 0.001249998 |
| O14 | 2i | -0.0591 | 0.7221 | 0.3372  | 1.0000 | 0.000924998 |
| O15 | 2i | 0.7991  | 0.5060 | -0.0837 | 1.0000 | 0.001124998 |
| O16 | 2i | 0.7797  | 0.5338 | 0.4244  | 1.0000 | 0.001087498 |
| O17 | 2i | 0.5854  | 0.3322 | 0.5254  | 1.0000 | 0.000937498 |
| O18 | 2i | 0.5836  | 0.3193 | 0.0402  | 1.0000 | 0.000862499 |
| O19 | 2i | 0.4820  | 0.2155 | 0.3182  | 1.0000 | 0.001224998 |
| O20 | 2i | 0.5331  | 0.7764 | 0.1608  | 1.0000 | 0.001187498 |
| Cr1 | 2i | 0.8326  | 0.8491 | 0.4573  | 0.0001 | 3.96249E-05 |
| Cr2 | 2i | 0.1376  | 0.1663 | 0.0509  | 0.0009 | 0.002666996 |
| Cr3 | 2i | 0.9476  | 0.9418 | 0.6633  | 0.0001 | 0.003466619 |
| Cr4 | 2i | 0.9367  | 0.9377 | 0.1678  | 0.0013 | 0.002254246 |
| Cr5 | 2i | 0.7538  | 0.7358 | 0.2515  | 0.0002 | 0.000996998 |
| Cr6 | 2d | 0.5000  | 0.0000 | 0.0000  | 0.0002 | 0.004252243 |
| Cr7 | 2g | 0.0000  | 0.5000 | 0.5000  | 0.0011 | 0.003556869 |

---

Crystal system: triclinic

Space group: P-1

Cell parameters: a=8.843680 Å, b=9.814705 Å, c=10.281434 Å

$\alpha=63.8062^\circ$ ,  $\beta=84.7335^\circ$  and  $\gamma=65.4034^\circ$

Cell volume: 724.012 Å<sup>3</sup>

Z=2

$R_{wp}=5.94\%$ ,  $R_p=4.35\%$ ,  $\chi^2=3.739$

---

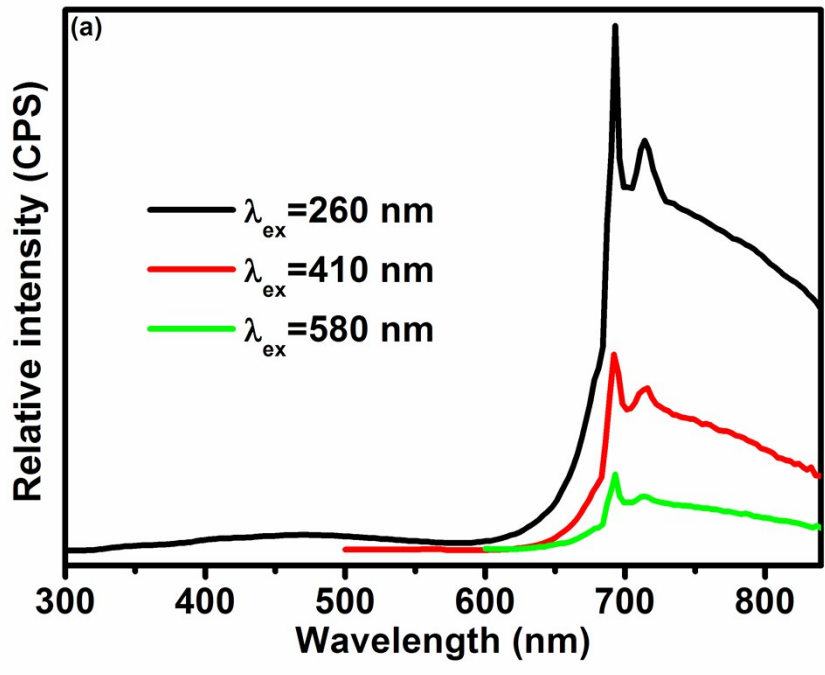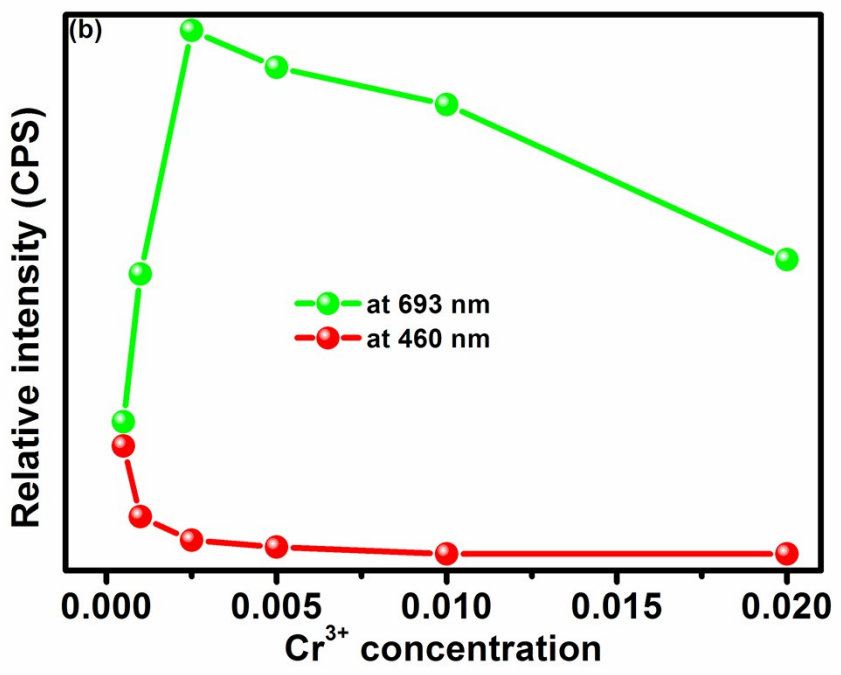

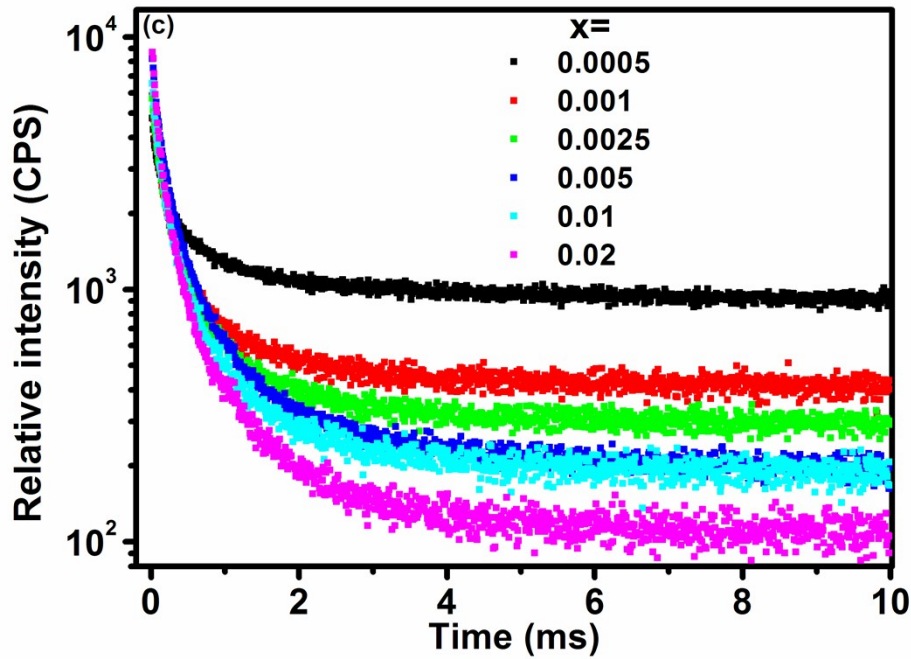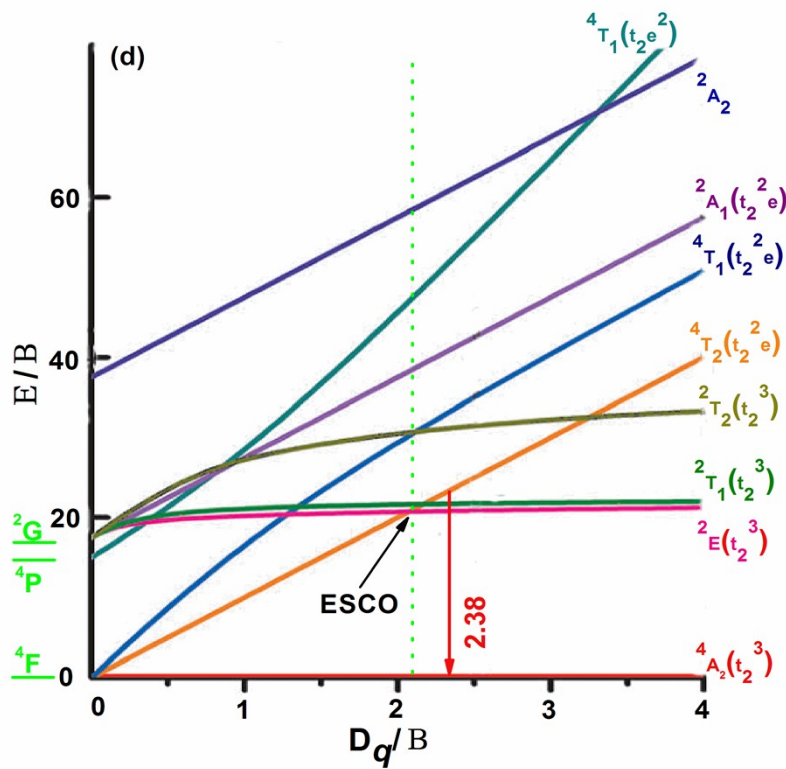

**Fig. S2** (a) Emission spectra of sample MGG:  $0.0025\text{Cr}^{3+}$  under the excitations with different wavelengths (260, 410 and 580 nm). (b) The dependence of emission intensity at 460 and 693 nm on the  $\text{Cr}^{3+}$  doping concentrations. (c) The fluorescence lifetime of samples MGG:  $x\text{Cr}^{3+}$  ( $x=0.0005-0.02$ ) under 260 nm excitation and monitoring emission at 460 nm. (d) Tanabe and Sugano diagram.

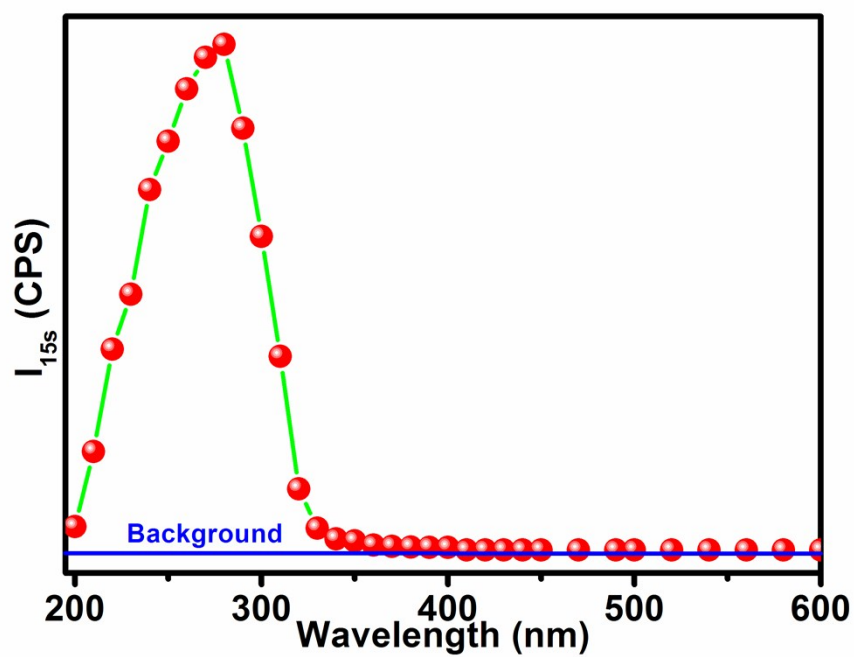

Fig. S3. NIR LPL excitation spectrum.

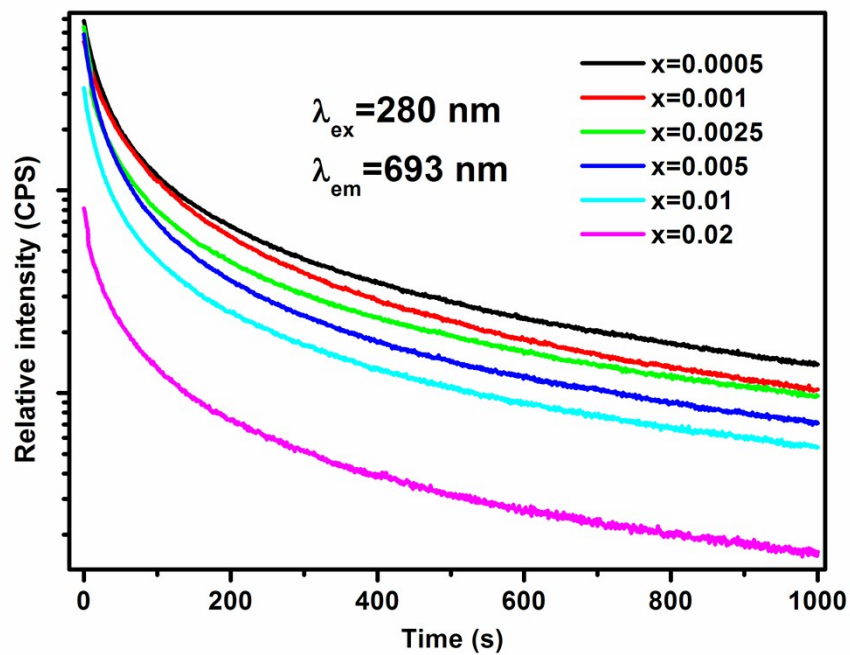

**Fig. S4.** LPL decay curves recorded at 693 nm emission for MGG:  $x\text{Cr}^{3+}$  ( $x=0-0.02$ ) LPPs after the stoppage of the 280 nm irradiation.



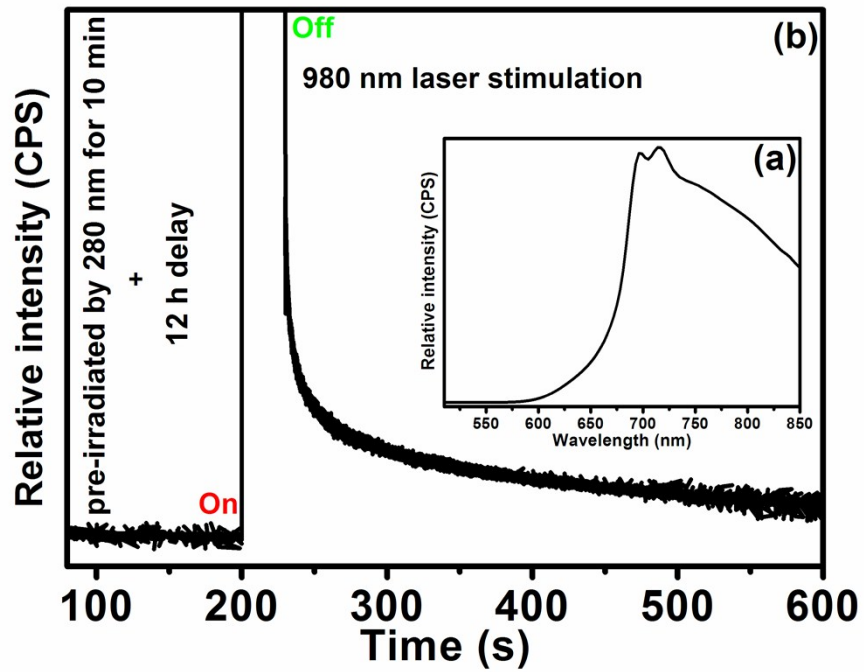

**Fig. S5.** (a) PSPL spectrum of MGG: 0.0005Cr<sup>3+</sup>. (b) PSPL decay curves monitored at 693 nm obtained through the 980 nm laser stimulation on a 12 h decayed MGG: 0.0005Cr<sup>3+</sup> sample with pre-irradiation by 280 nm light for 10 min.

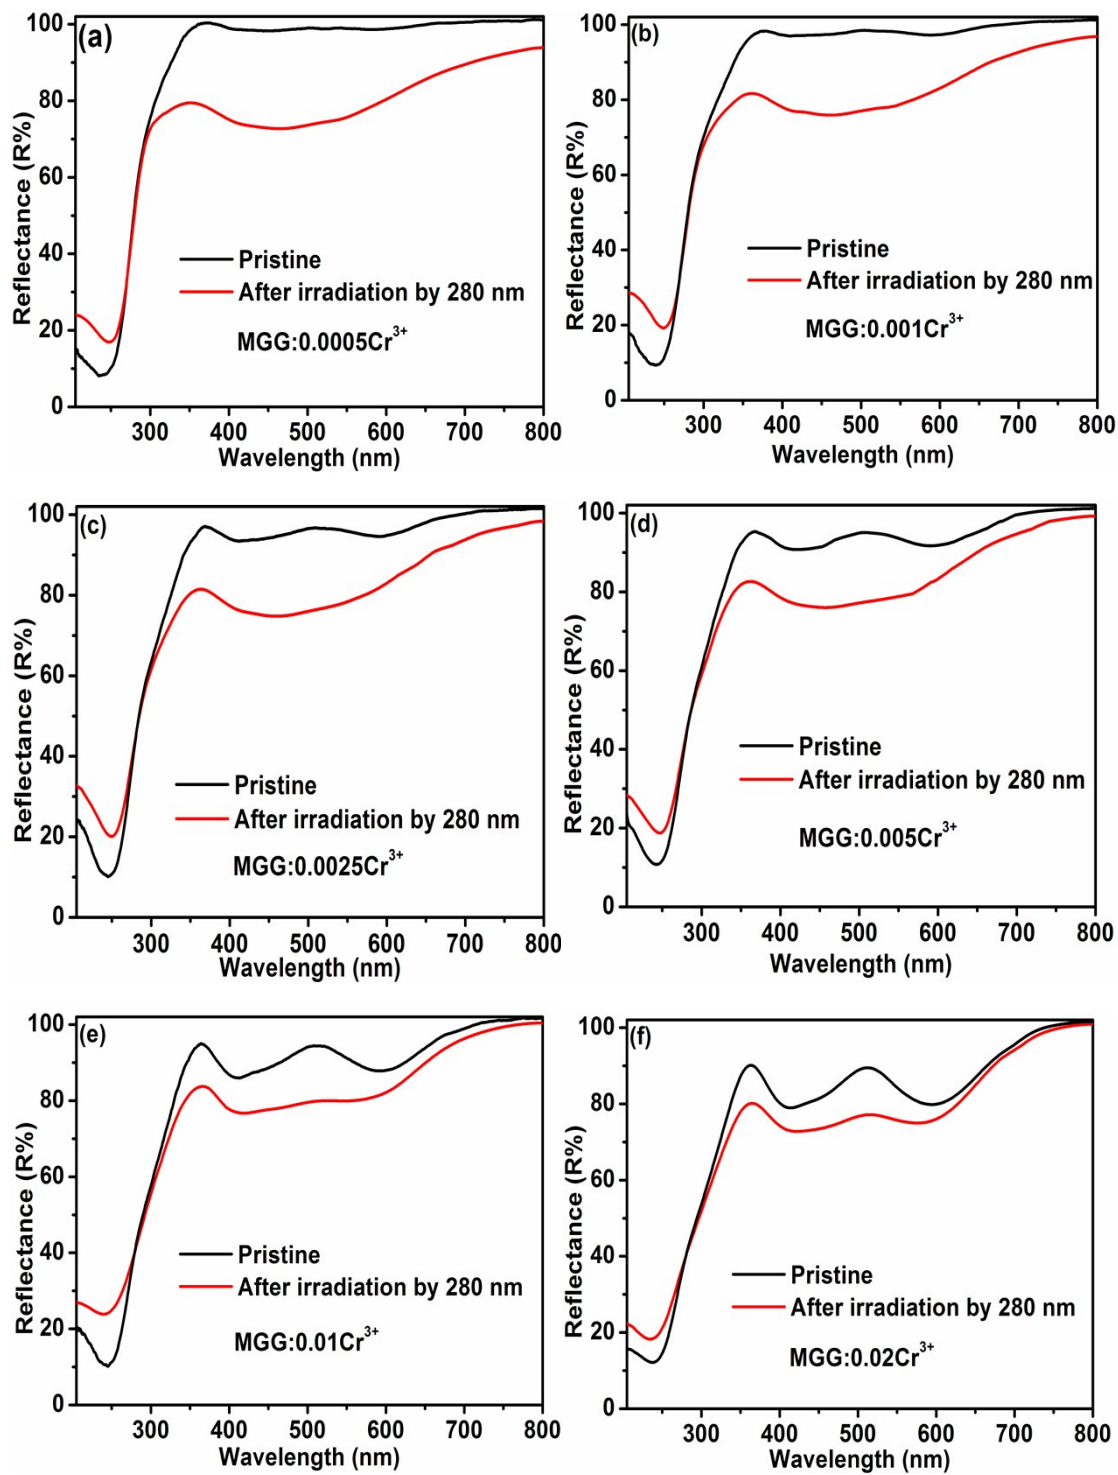

**Fig. S6.** The DRS of the pristine and UV (280 nm) irradiated samples MGG:  $x\text{Cr}^{3+}$  ( $x=0.0005-0.02$ ): (a)  $x=0.0005$ , (b)  $x=0.001$ , (c)  $x=0.0025$ , (d)  $x=0.005$ , (e)  $x=0.01$  and (f)  $x=0.02$ .

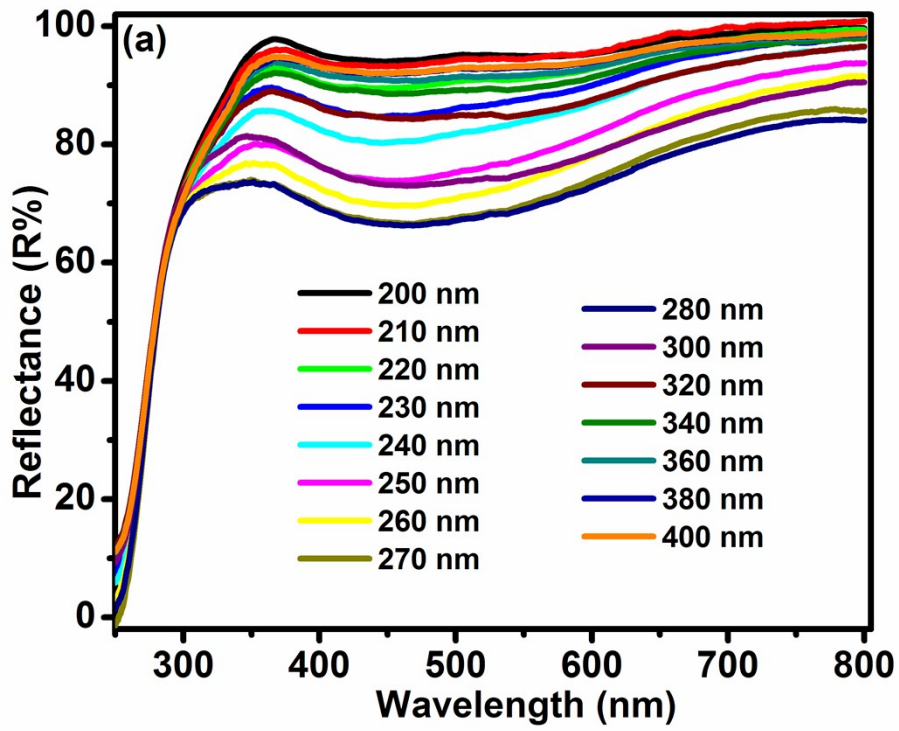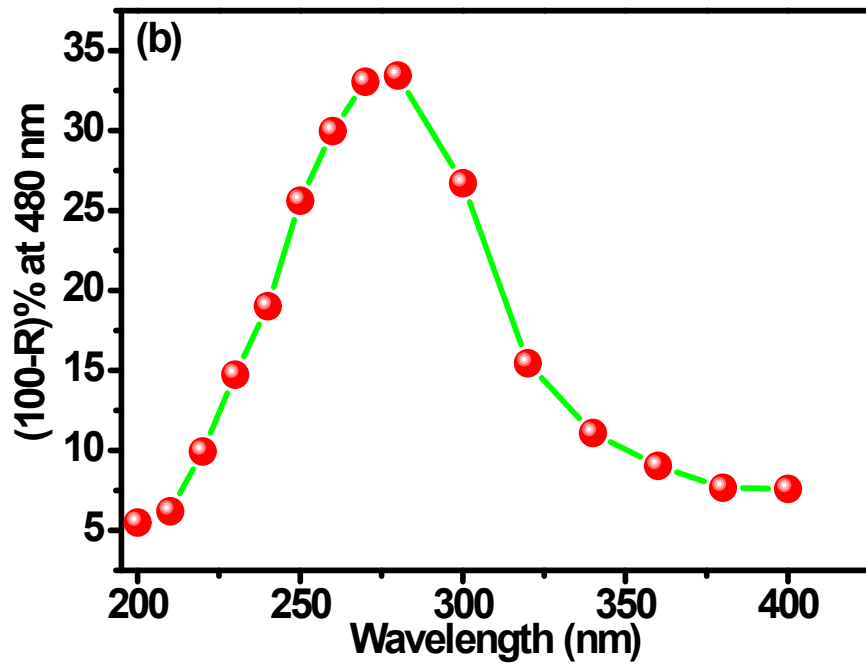

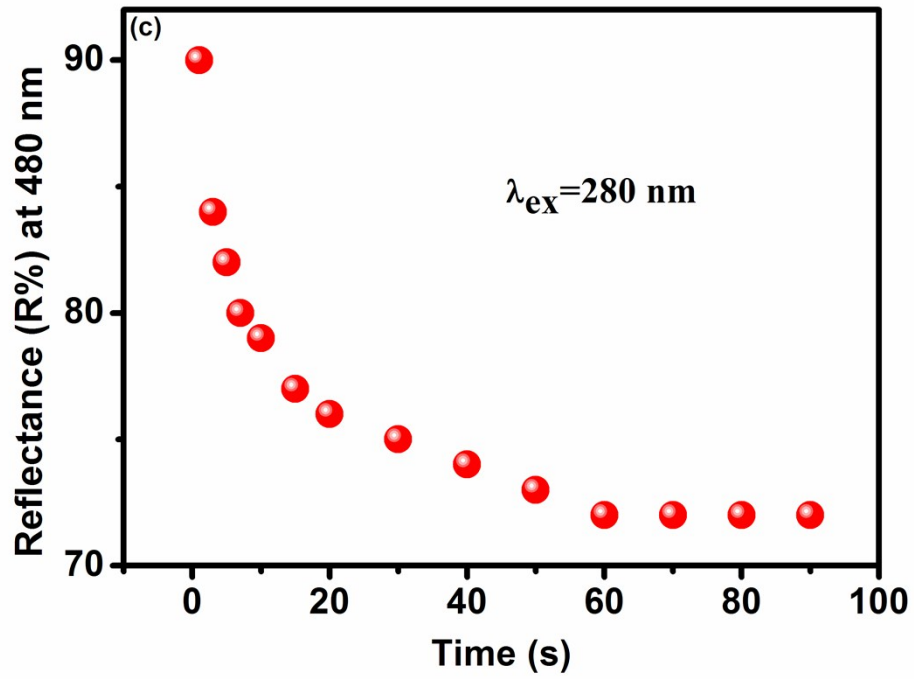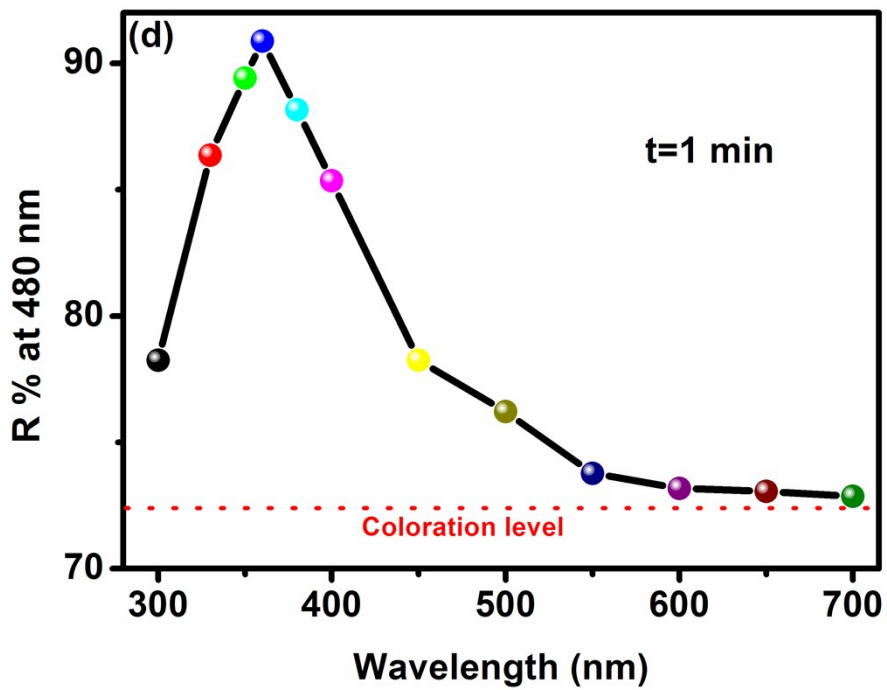

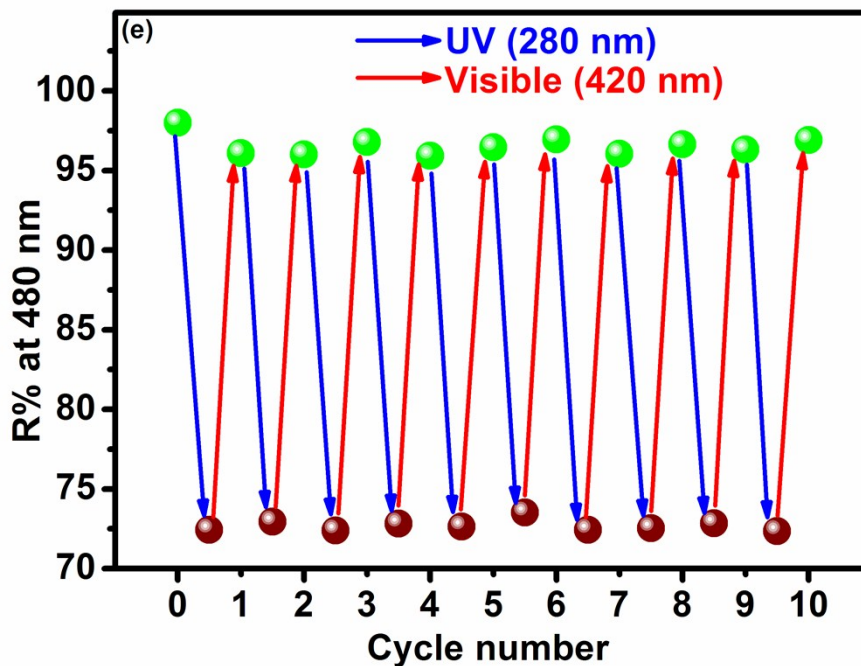

**Fig. S7.** (a) DRS of sample MGG: 0.0005Cr after irradiation with various wavelengths (200-400 nm). (b) The dependence of the (100-R) % values on the wavelengths according to (a). (c) DRS intensity at 480 nm of MGG: 0.0005Cr after 280 nm irradiation with various durations (0-90 s). (d) The dependence of values (R%) at 480 nm as a function of bleaching light wavelengths (300-700 nm) for sample MGG: 0.0005Cr with pre-irradiation by 280 nm for 3 min. (e) DRS intensity changes at 480 nm by alternating 280 and 420 nm light irradiations.

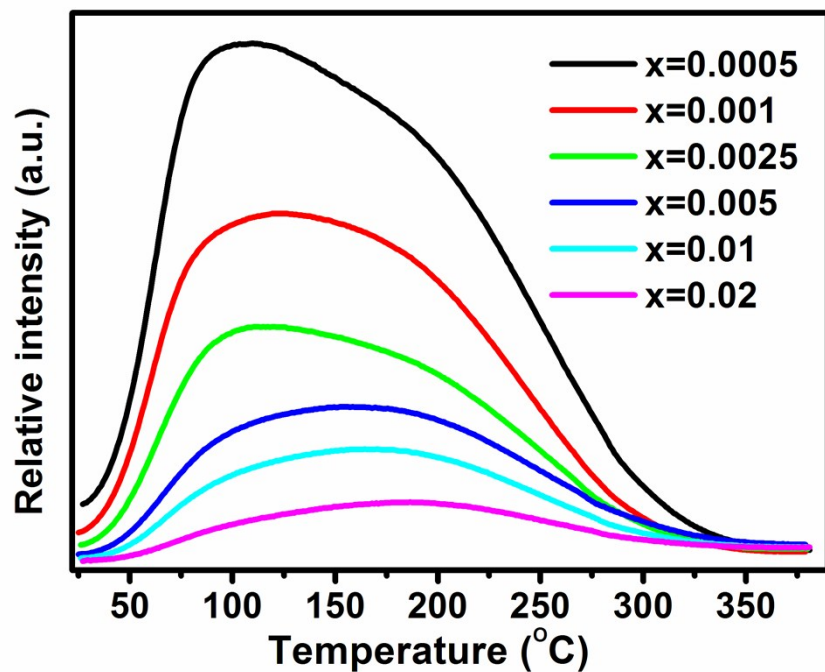

**Fig. S8.** TL glow curves of samples MGG: xCr ( $x=0.0005-0.02$ ) 3 min after the pre-irradiation by UV light (280 nm) for 5 min.

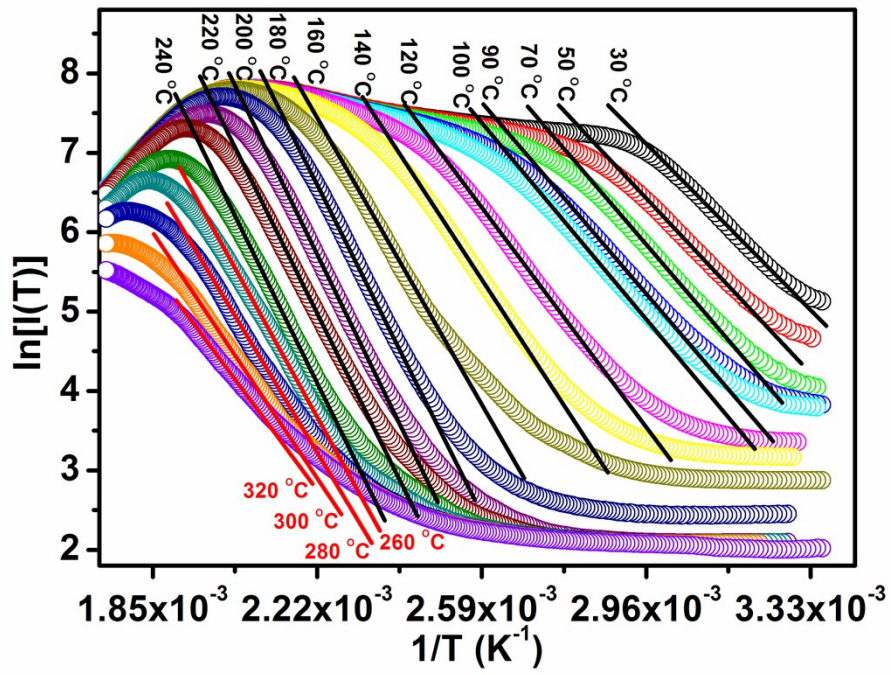

**Fig. S9.** Initial rise method analysis on the TL glow curves of sample MGG: 0.0005Cr as a function of temperatures based on eqn (4).

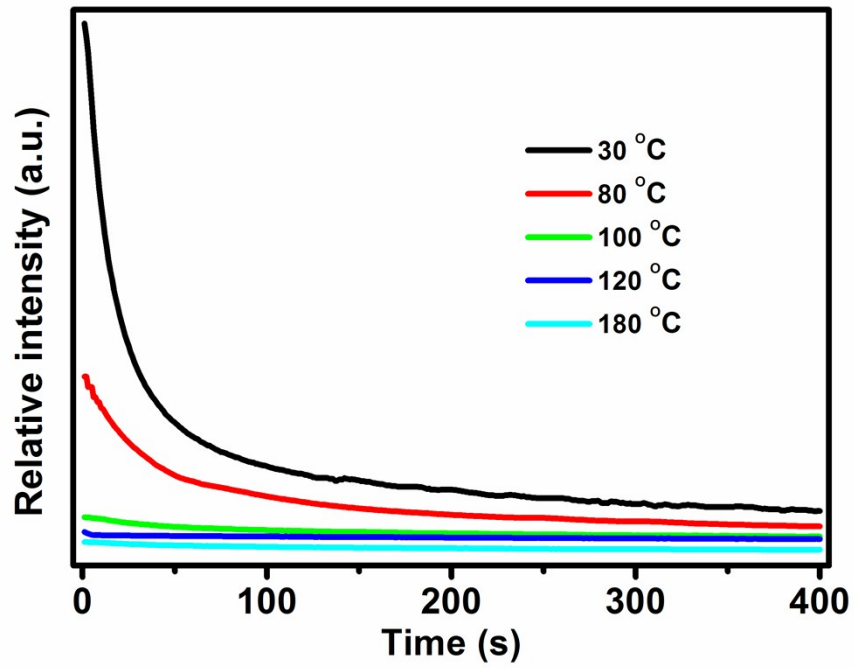

**Fig. S10.** NIR LPL decay curves of UV (280 nm) pre-irradiated sample MGG: 0.0005Cr for 5 min recorded after 10 s preheating at a certain temperature at the beginning of the 3 min delay duration time and then cooling down to room temperature.



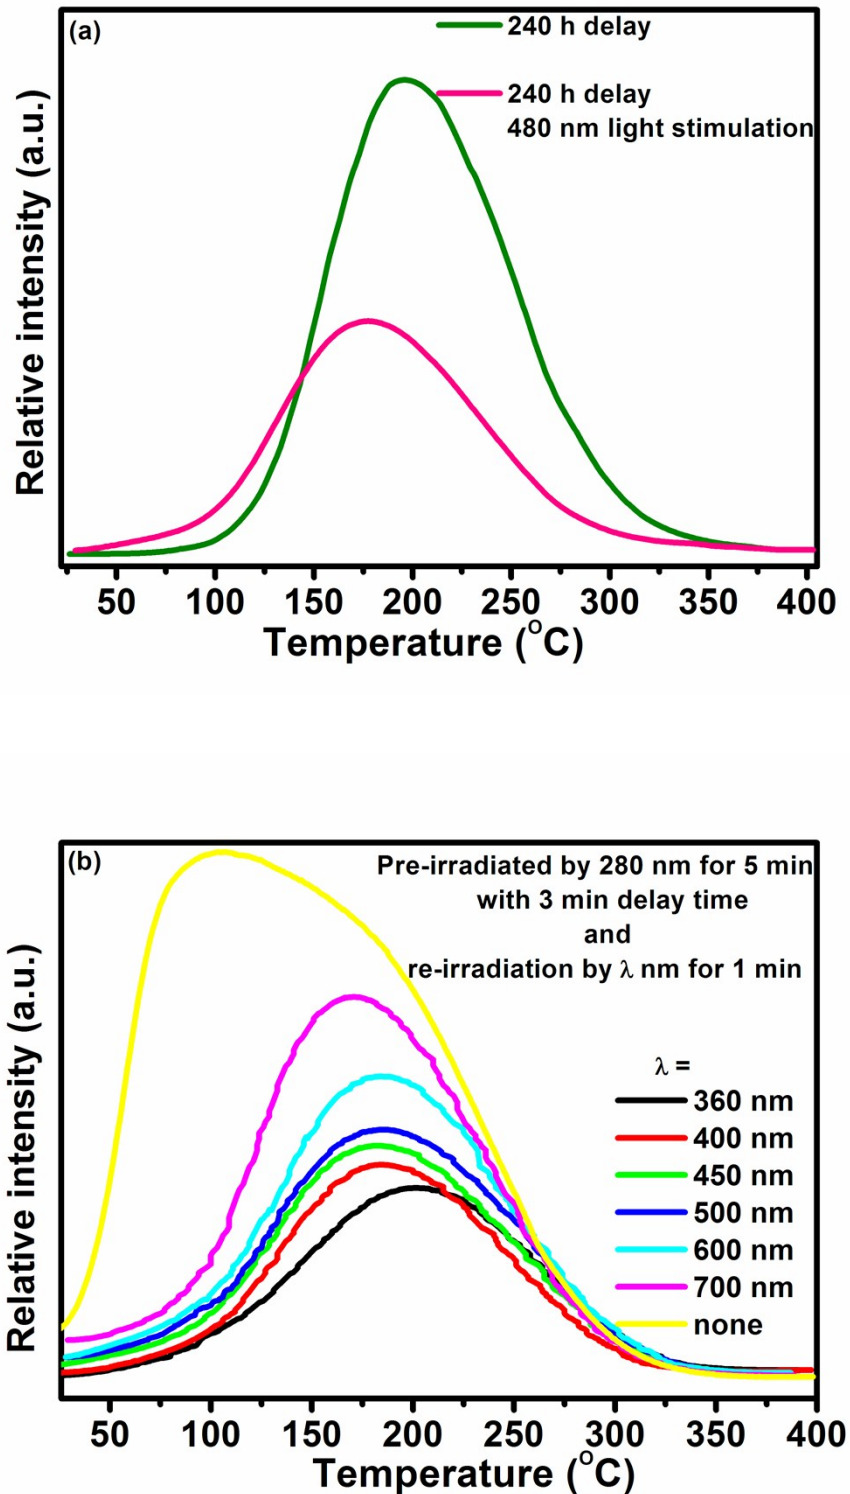

**Fig. S11.** TL glow curves of sample MGG: 0.0005Cr after irradiation at 280 nm for 10 min at 240 delay time with (lower) and without (upper) 480 nm light stimulation. (b) TL glow curves of sample MGG: 0.0005Cr without and with light stimulations by different wavelengths (360-700 nm). The sample is pre-irradiated by 280 nm for 5 min with 3 min delay time.

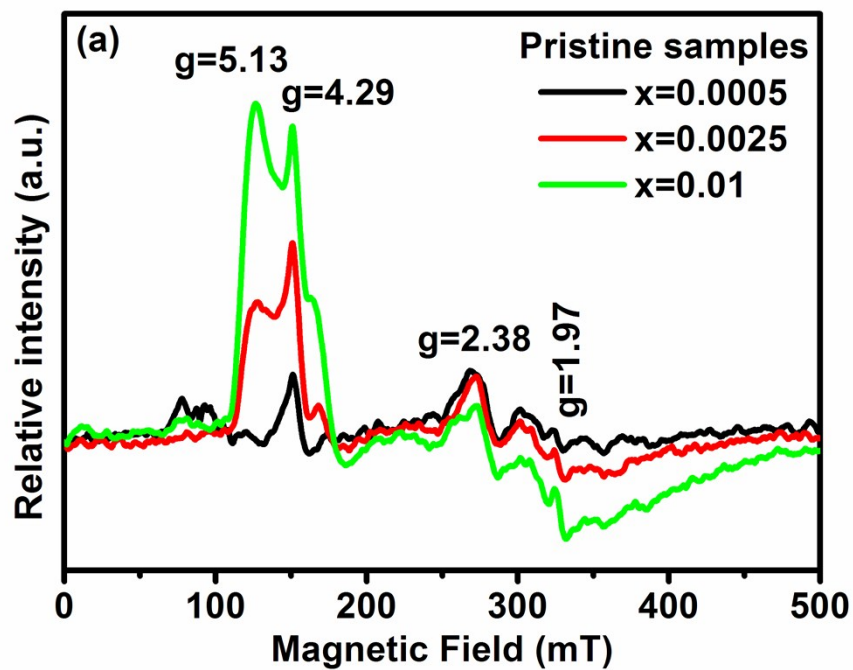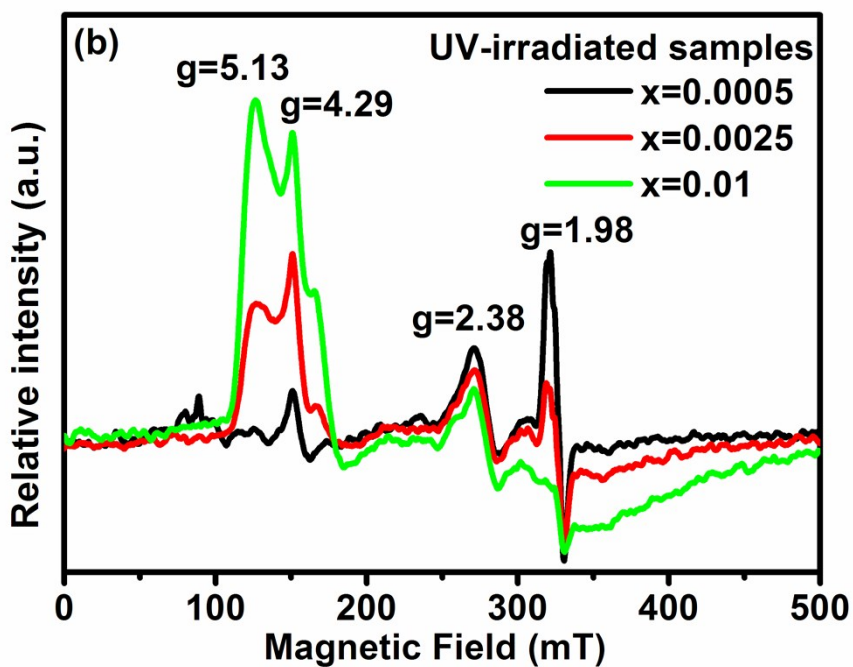

**Fig. S12.** ESR spectra of the pristine (a) and UV- (280 nm) irradiated (b) samples MGG: xCr ( $x=0.0005$ ,  $0.0025$  and  $0.01$ ).
